# Supplementary material for: Grafting the surface of carbon nanotubes and carbon black with the chemical properties of hyperbranched polyamines
Source: PubMed Central journal article supplement (PMC5111562; doi:10.1080/14686996.2016.1221728), 2016-09-12
Supplement: tsta_a_1221728_sm2801.pdf [file tsta_a_1221728_sm2801.pdf]

## Supplementary data

### **Grafting the surface of carbon nanotubes and carbon black with the chemical properties of hyperbranched polyamines**

Francisco Morales-Lara<sup>a</sup>, María Domingo-García<sup>a</sup>, Rafael López-Garzón<sup>b</sup>, M. Luz Godino-Salido<sup>b</sup>, Antonio Peñas-Sanjuán<sup>c</sup>, F. Javier López-Garzón<sup>a</sup>, Manuel Pérez-Mendoza<sup>a</sup> and Manuel Melguizo<sup>b</sup>

<sup>a</sup>Dpto. de Química Inorgánica, Facultad de Ciencias, Universidad de Granada, 18071 Granada, Spain.

<sup>b</sup>Dpto. de Química Inorgánica y Orgánica, Facultad de Ciencias Experimentales, Universidad de Jaén, 23071 Jaén, Spain.

<sup>c</sup>Andaltec, Plastic Technology Center, Pol. Ind. Cañada de la Fuente, Calle Vílchez, s/n, 23600 Martos, Jaén, Spain.

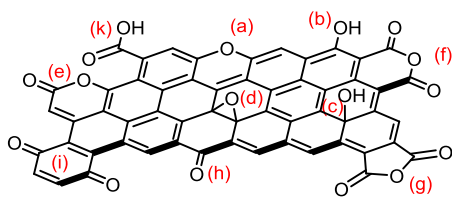

**Figure S1.** The main oxygen containing groups in carbon materials.

Table S1. Reactivity of the oxygen containing groups.

| Functional group                 | Reactivity with amine groups |
|----------------------------------|------------------------------|
| (a) Ether (pyrone)               | No reaction                  |
| (b) Phenol                       | No reaction                  |
| (c) Hydroxyl                     | No reaction                  |
| (d) Epoxide                      | No reaction <sup>a</sup>     |
| (e) Lactone                      | No reaction                  |
| (f) Cyclic anhydride (6 members) |                              |
| (g) Cyclic anhydride (5 members) |                              |
| (h) Carbonyl                     |                              |
| (i) Quinone                      |                              |
| (k) Carboxylic acid              |                              |

<sup>a</sup>Epoxides usually react with amine groups, but in carbon materials there are restrictions which hinder the reaction (see the introduction of the manuscript).

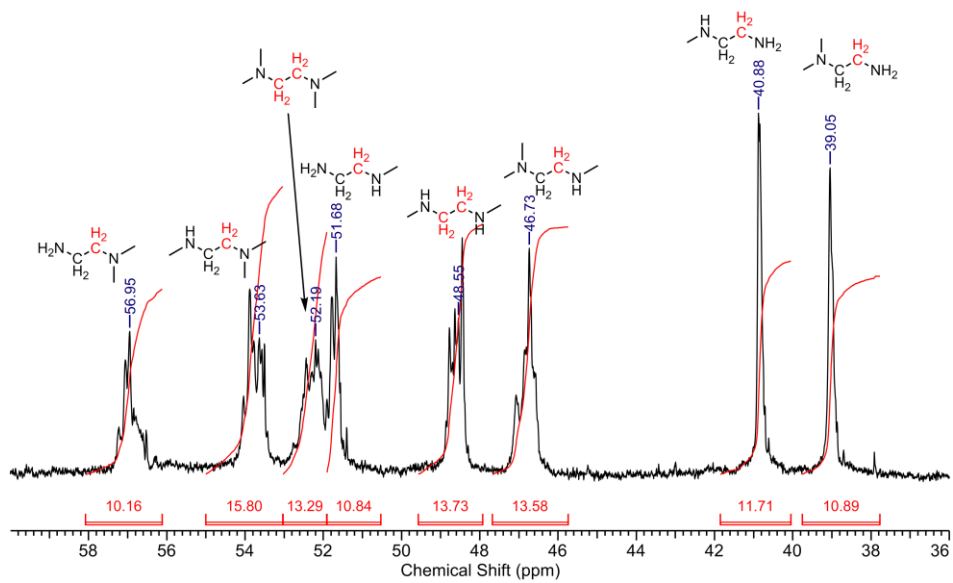

Figure S2. Quantitative  $^{13}\text{C}$ -RMN ( $\text{CDCl}_3$ , 100 MHz) spectrum of HBPEI<sub>600</sub>.

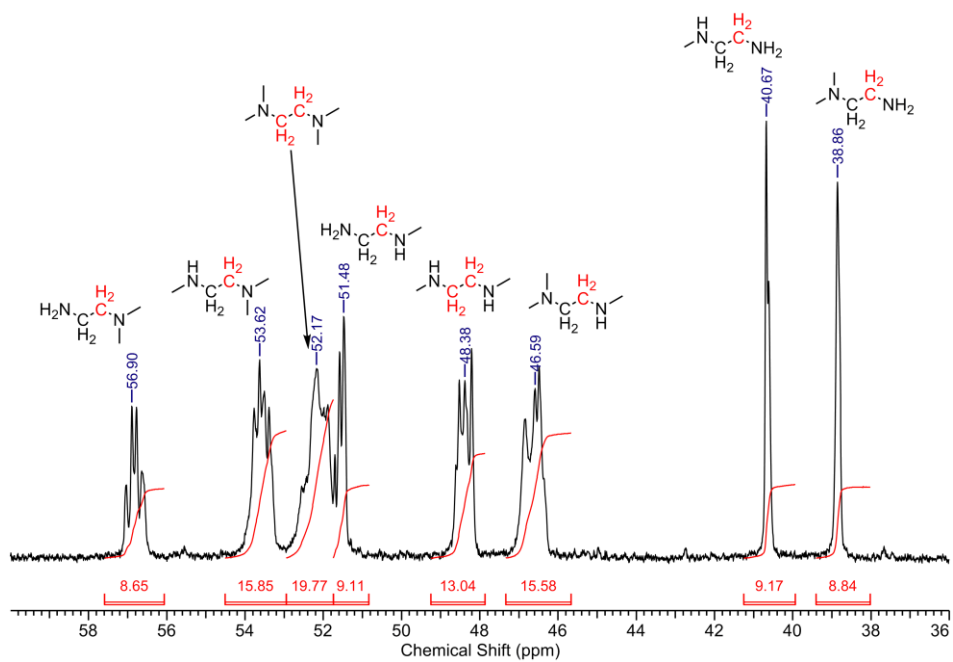

Figure S3. Quantitative  $^{13}\text{C}$ -RMN ( $\text{CDCl}_3$ , 100 MHz) spectrum of HBPEI<sub>1800</sub>.

Table S2. Chemical composition from elemental analysis.

| E. A.                | C    | N   | O    | H   |     |
|----------------------|------|-----|------|-----|-----|
| MW/pH9-1800          | 84,7 | 2,6 | 11,8 | 0,9 |     |
| MW/O3G(60)-1800      | 89,2 | 3,7 | 5,8  | 1,3 |     |
| MW/OP(2)-1800        | 92,3 | 2,8 | 3,8  | 1,2 |     |
| MW/OP(30)-1800       | 90,6 | 3,9 | 3,9  | 1,6 |     |
| MW/pH9-Est-1800      | 92,5 | 2,7 | 3,9  | 1,0 |     |
| MW/OP(2)-Est-1800    | 91,9 | 2,7 | 4,4  | 1,0 |     |
| MW/OP(30)-Est-1800   | 90,2 | 3,2 | 5,2  | 1,3 |     |
| MW/pH9-600           | 93,2 | 1,6 | 4,5  | 0,7 |     |
| MW/OP(30)-600        | 92,9 | 2,7 | 3,4  | 1,0 |     |
| MW/pH9-Est-600       | 92,2 | 1,7 | 5,2  | 0,9 |     |
|                      | C    | N   | O    | S   | H   |
| CSX/pH9-1800         | 94,7 | 0,6 | 3,4  | 0,7 | 0,6 |
| CSX/O3G-1800         | 95,0 | 0,8 | 2,8  | 0,7 | 0,7 |
| CSX/OP(2)-1800       | 94,6 | 0,7 | 3,4  | 0,8 | 0,7 |
| CSX/OP(10)-1800      | 94,0 | 0,8 | 3,7  | 0,8 | 0,7 |
| CSX/pH9-Est-1800     | 94,8 | 0,6 | 3,4  | 0,8 | 0,5 |
| CSX/O3G(60)-Est-1800 | 94,5 | 0,6 | 3,6  | 0,7 | 0,5 |
| CSX/OP(2)-Est-1800   | 94,4 | 0,6 | 3,7  | 0,8 | 0,5 |
| CSX/OP(10)-Est-1800  | 94,1 | 0,7 | 3,9  | 0,8 | 0,5 |

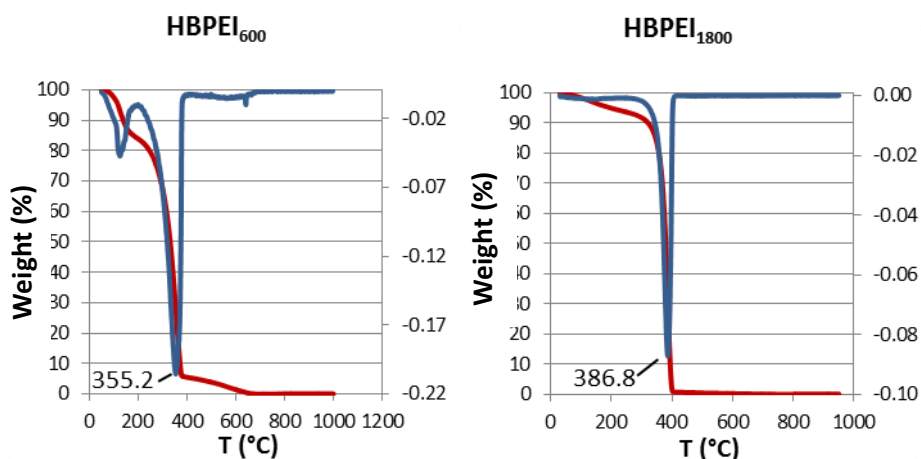

Figure S4. TG (red line) and DTG (blue line) plots of both polyamines. Experimental conditions: nitrogen flow ( $80 \text{ ml} \cdot \text{min}^{-1}$ ), heating rate  $10 \text{ }^\circ\text{C} \cdot \text{min}^{-1}$ .

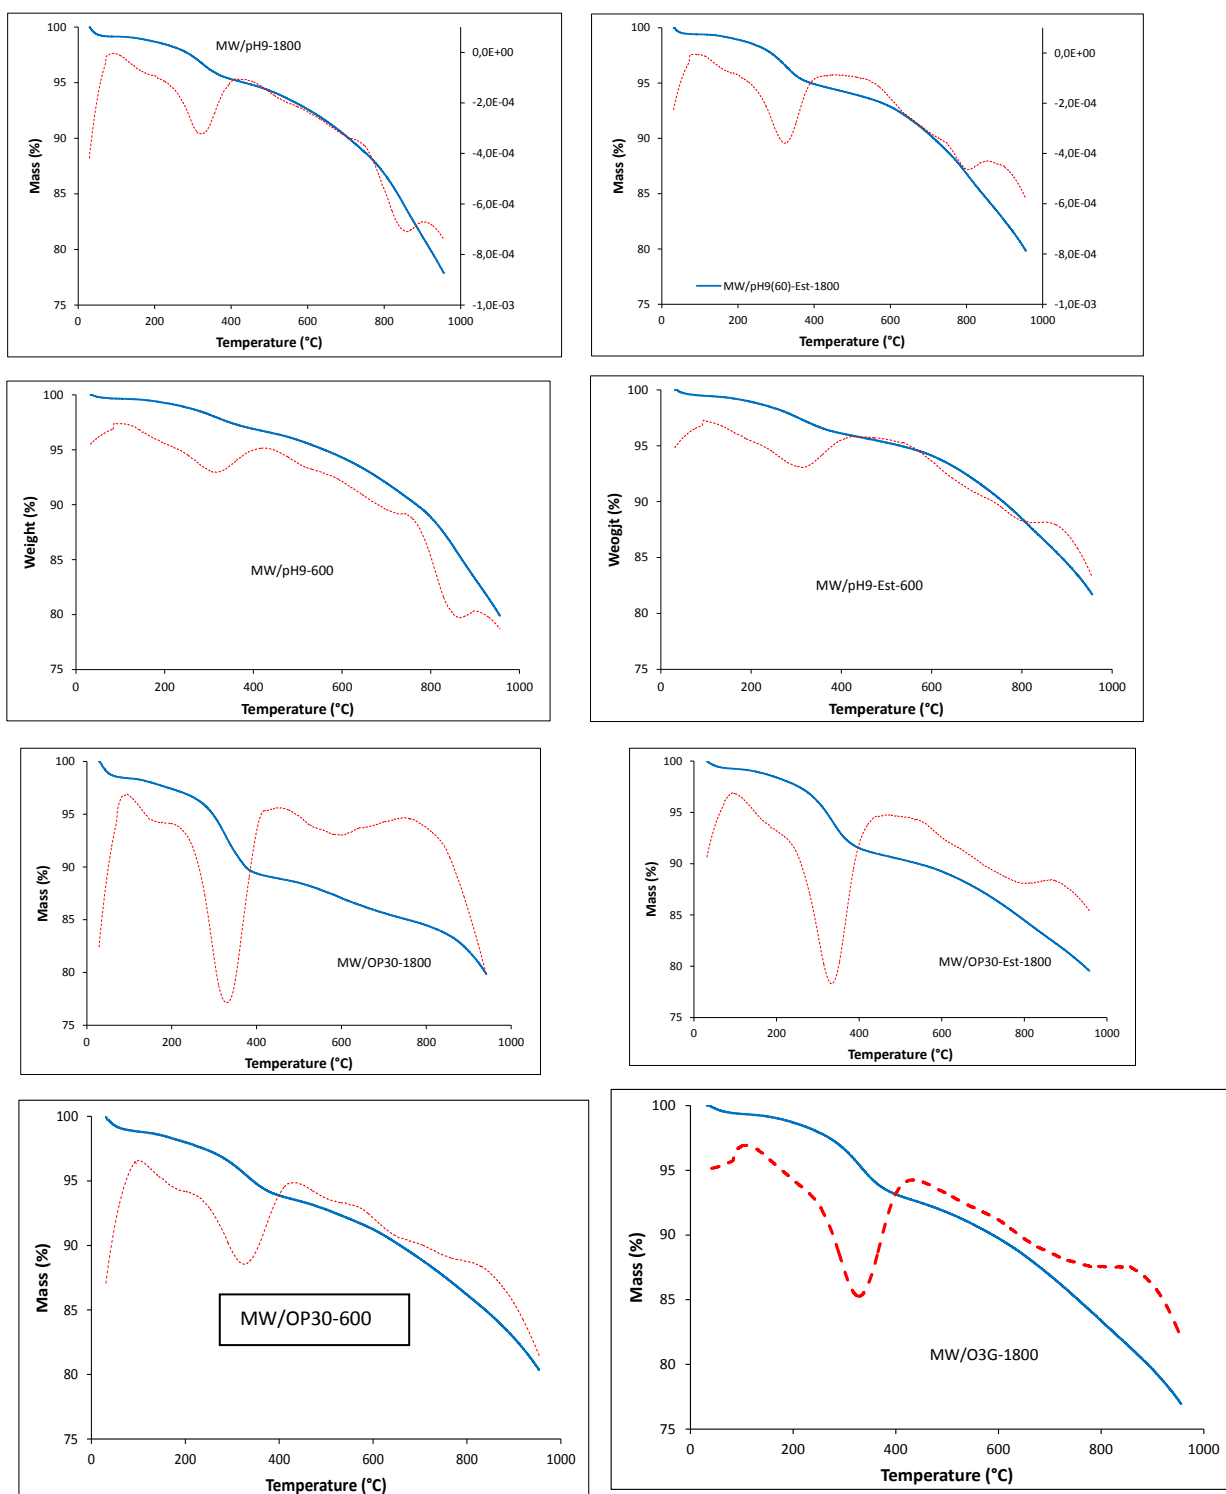

Figure S5. TG (red line) and DTG (blue line) plots of hybrids of MW-series. Experimental conditions: nitrogen flow ( $80 \text{ ml} \cdot \text{min}^{-1}$ ), heating rate  $10 \text{ }^\circ\text{C} \cdot \text{min}^{-1}$ .

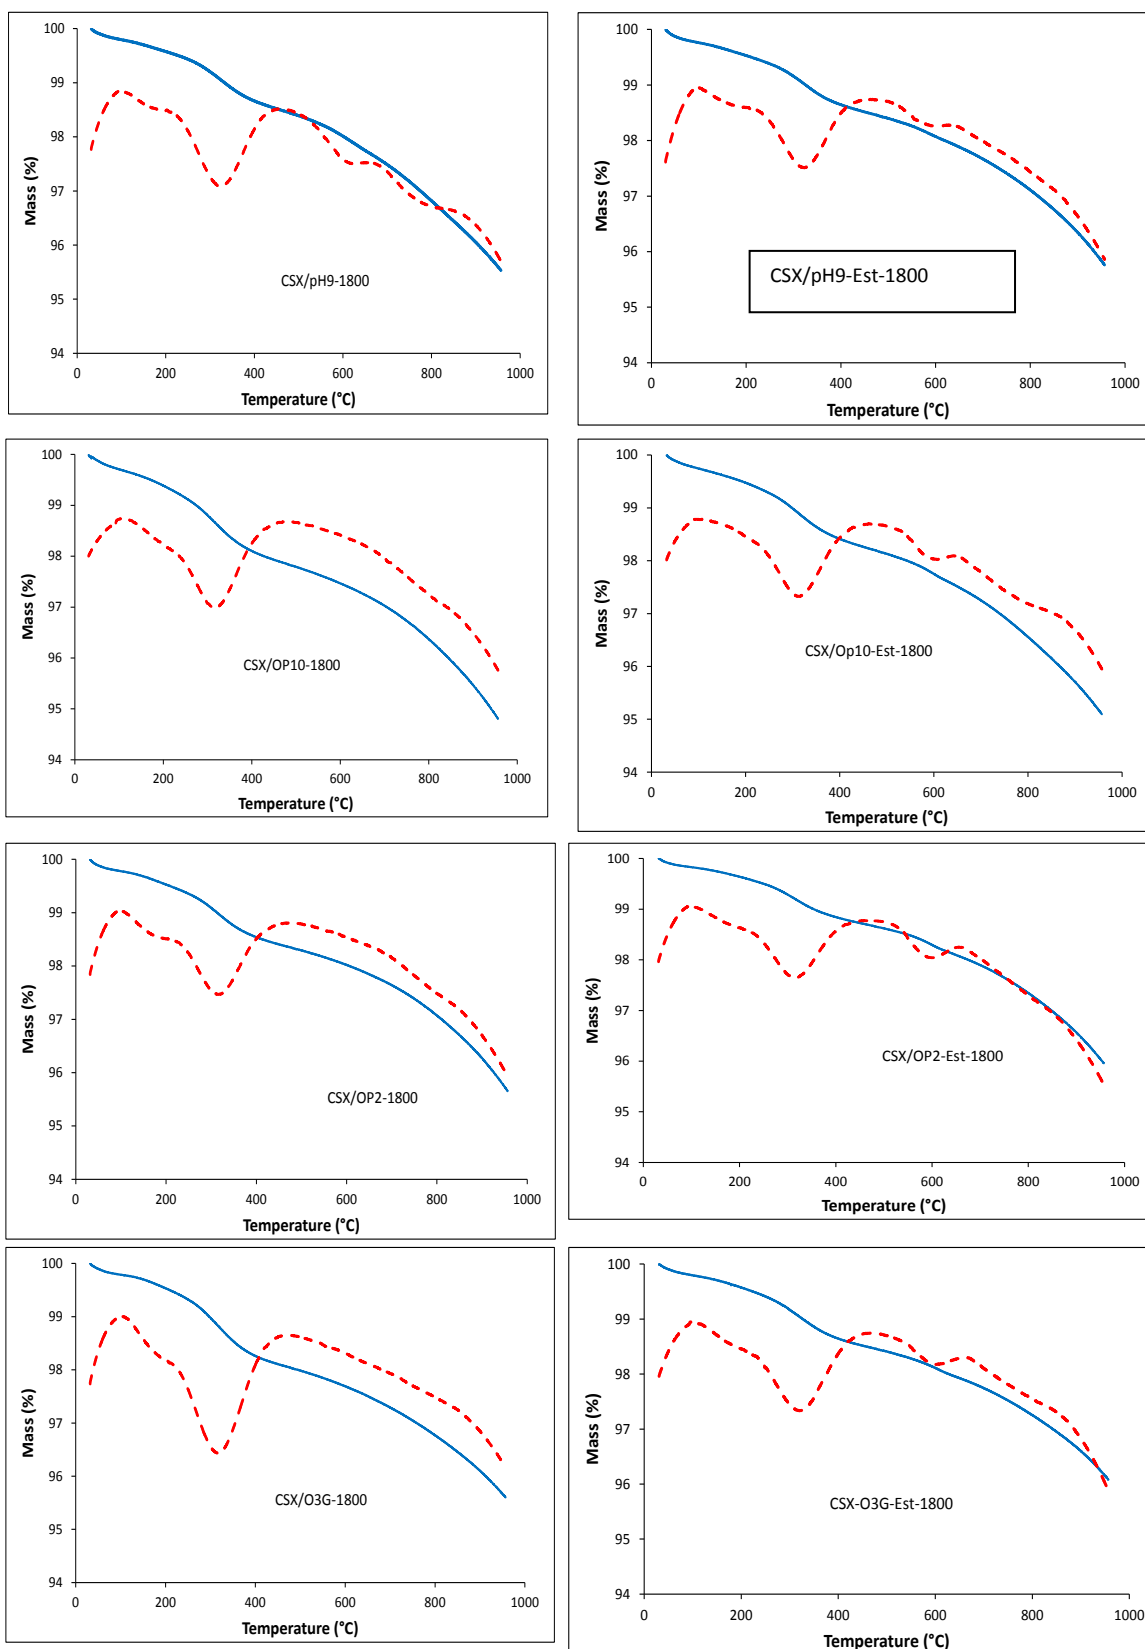

Figure S6. TG (red line) and DTG (blue line) plots of hybrids of CSX-series. Experimental conditions: nitrogen flow ( $80 \text{ ml} \cdot \text{min}^{-1}$ ), heating rate  $10 \text{ }^\circ\text{C} \cdot \text{min}^{-1}$ .

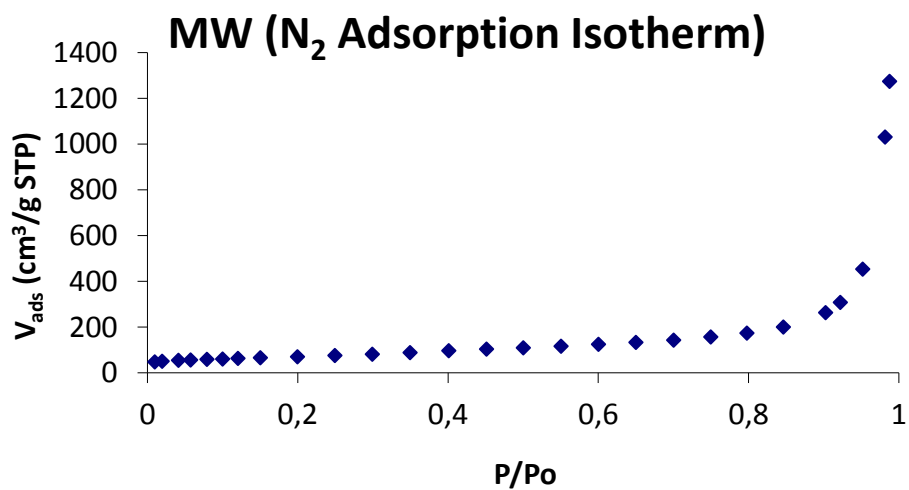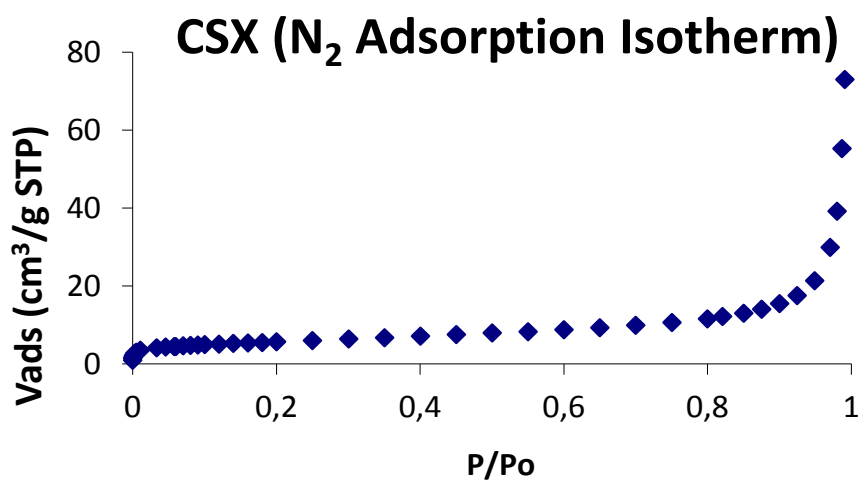

Figure S7. Nitrogen adsorption isotherms of the original MW and CSX.

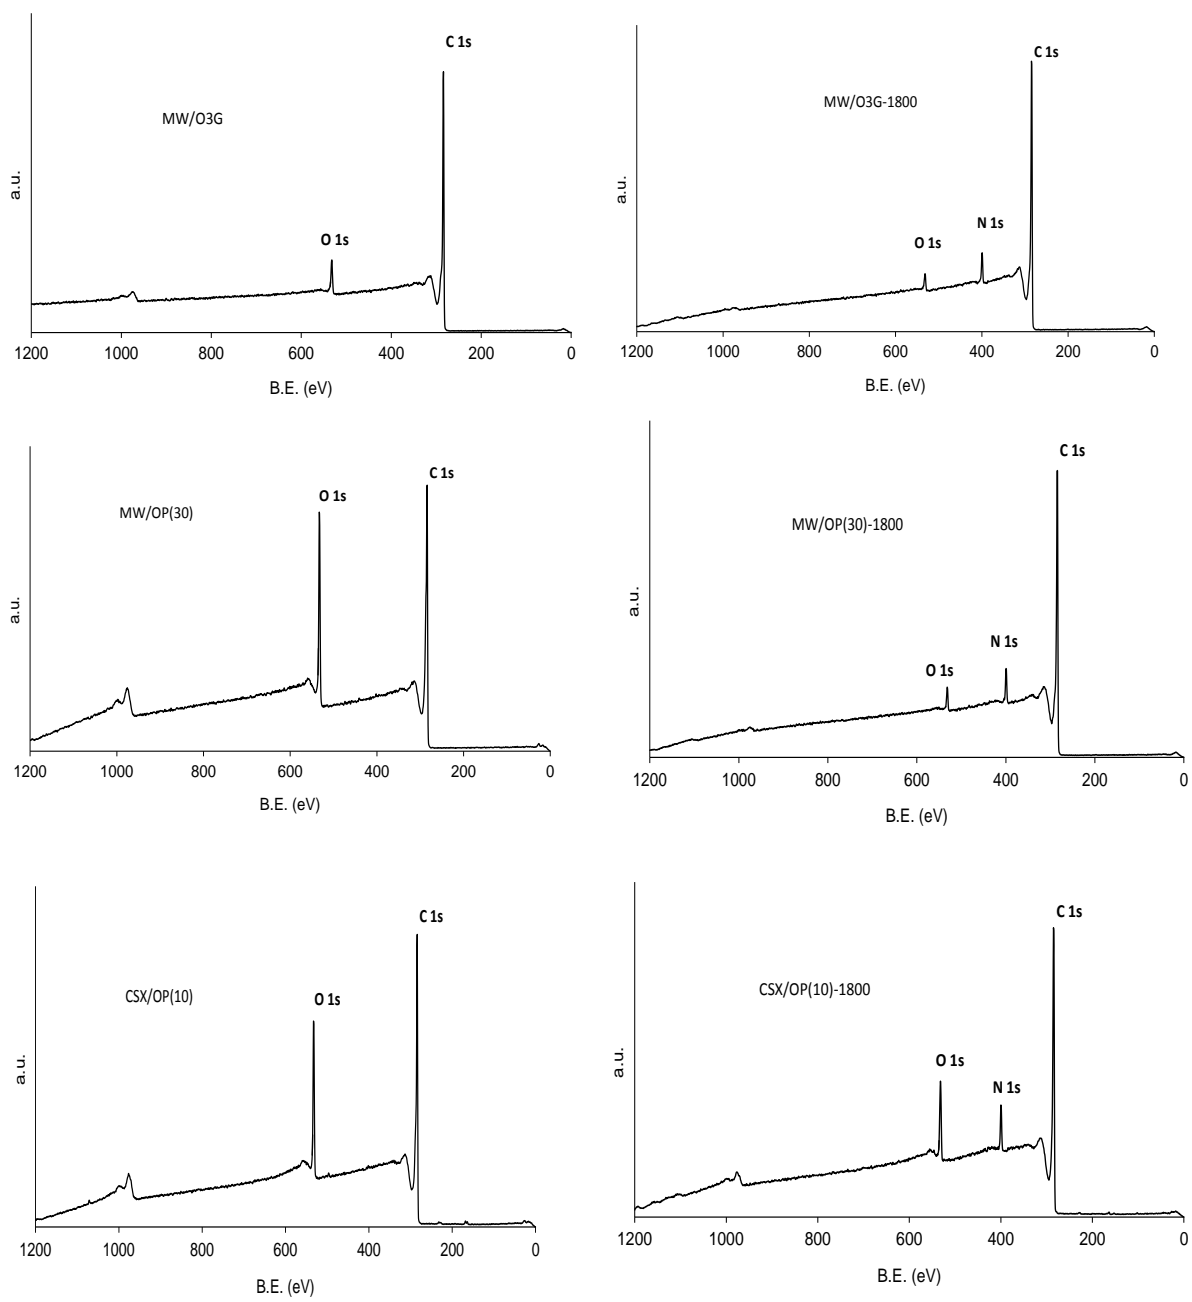

Figure S8. The XPS survey spectra of samples discussed in figure 7 of the manuscript.



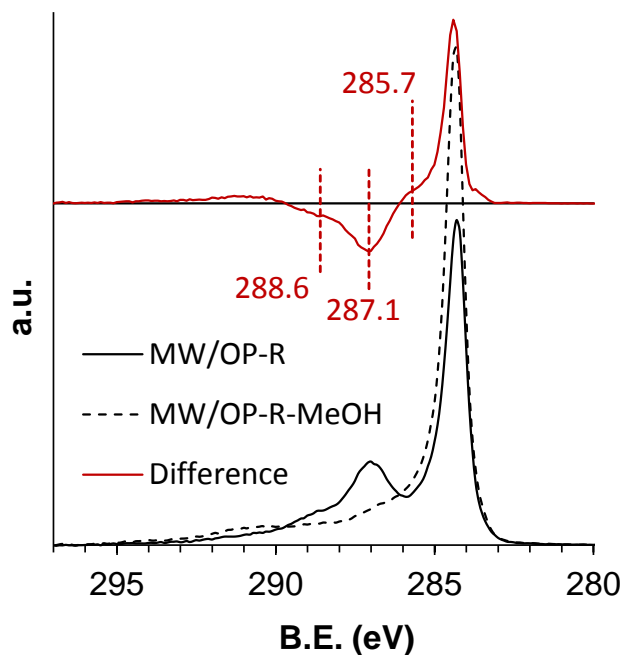

Figure S9. The treatment of a plasma oxidized sample with methanol at room temperature for 1 hour results in the loss of the labile oxygen containing groups as it seen by comparing the XPS spectra of the parent sample, MW/OP-R, and of methanol treated sample, MW/OP-R-MeOH. Both spectra and the difference are collected in this figure. Thus a significant decrease of the XPS signal in the 286-287 eV range is apparent after the treatment with methanol.

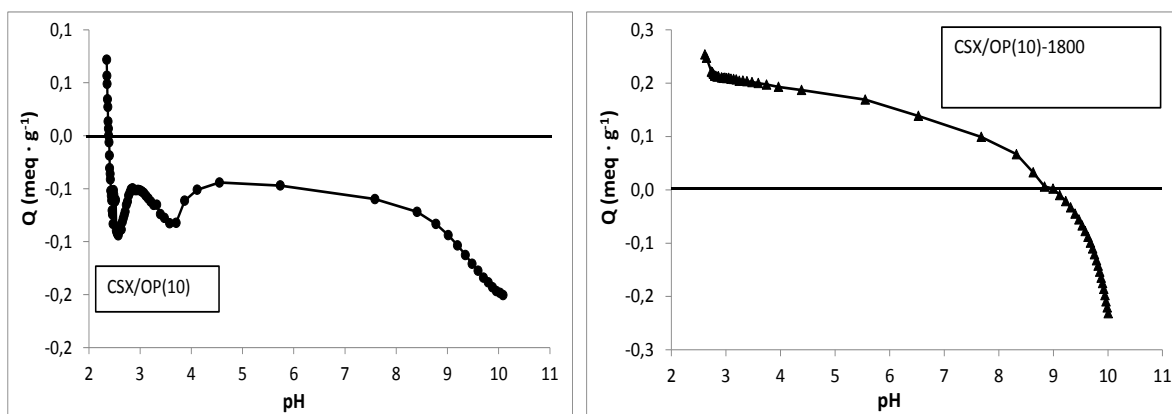

Figure S10. Plots to determine the zero point of charge.

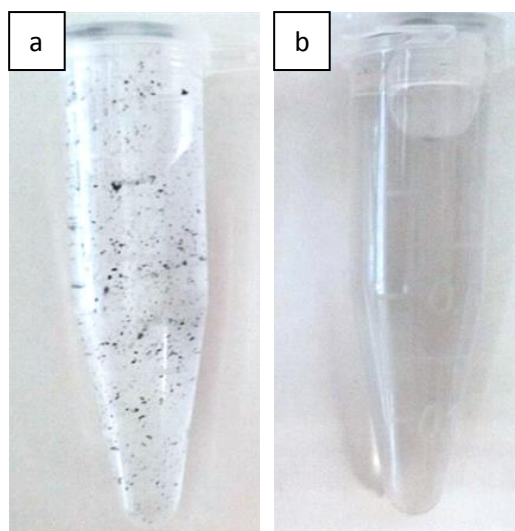

Figure S11. a) original MW and b) MW/OP(30)-1800, both in water.

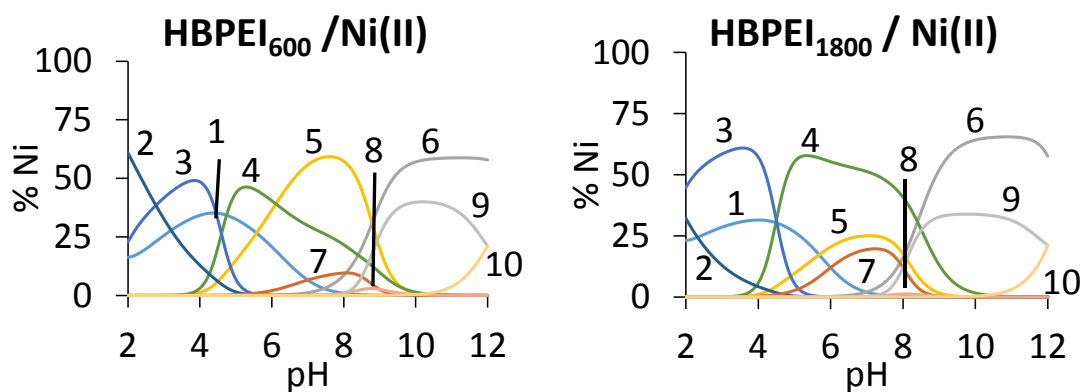

Figure S12. Species distribution plots resulting from the reaction of the polyamines with  $\text{Ni}^{2+}$ . The numbers refer to the equilibria in Table S2.

Table S3. Equilibrium constants ( $\log K$ ) of HBPEI/Ni(II).

| Equilibrium                                                                                    | $\log K$                    |                              |
|------------------------------------------------------------------------------------------------|-----------------------------|------------------------------|
|                                                                                                | <i>HBPEI</i> <sub>600</sub> | <i>HBPEI</i> <sub>1800</sub> |
| 1 $[\text{H}_2\text{L}]^{2+} + \text{Ni}^{2+} \leftrightarrow [\text{NiH}_2\text{L}]^{4+}$     | $3.19 \pm 0.04$             | $2.74 \pm 0.04$              |
| 2 $[\text{H}_3\text{L}_2]^{3+} + \text{Ni}^{2+} \leftrightarrow [\text{NiH}_3\text{L}_2]^{5+}$ | $6.66 \pm 0.05$             | $6.30 \pm 0.05$              |
| 3 $\text{L} + \text{Ni}^{2+} \leftrightarrow [\text{NiL}]^{2+}$                                | $10.48 \pm 0.06$            | $10.42 \pm 0.06$             |
| 4 $2\text{L} + \text{Ni}^{2+} \leftrightarrow [\text{NiL}_2]^{2+}$                             | $18.40 \pm 0.05$            | $18.60 \pm 0.05$             |
| 5 $[\text{L}_2\text{Ni}]^{2+} + \text{H}^+ \leftrightarrow [\text{NiHL}_2]^{3+}$               | $8.40 \pm 0.02$             | $8.40 \pm 0.02$              |
| 6 $\text{Ni}^{2+} + \text{OH}^- \leftrightarrow [\text{Ni}(\text{OH})]^+$                      | $-7.00 \pm 0.08$            | $-7.00 \pm 0.08$             |
| 7 $[\text{Ni}(\text{OH})]^+ + \text{OH}^- \leftrightarrow [\text{Ni}(\text{OH})_2]$            | $-9.00 \pm 0.04$            | $-9.00 \pm 0.04$             |
| 8 $[\text{Ni}(\text{OH})_2] + \text{OH}^- \leftrightarrow [\text{Ni}(\text{OH})_3]^-$          | $-7.00 \pm 0.02$            | $-7.00 \pm 0.02$             |
| 9 $[\text{Ni}(\text{OH})_3]^- + \text{OH}^- \leftrightarrow [\text{Ni}(\text{OH})_4]^{2-}$     | $-12.00 \pm 0.02$           | $-12.00 \pm 0.02$            |

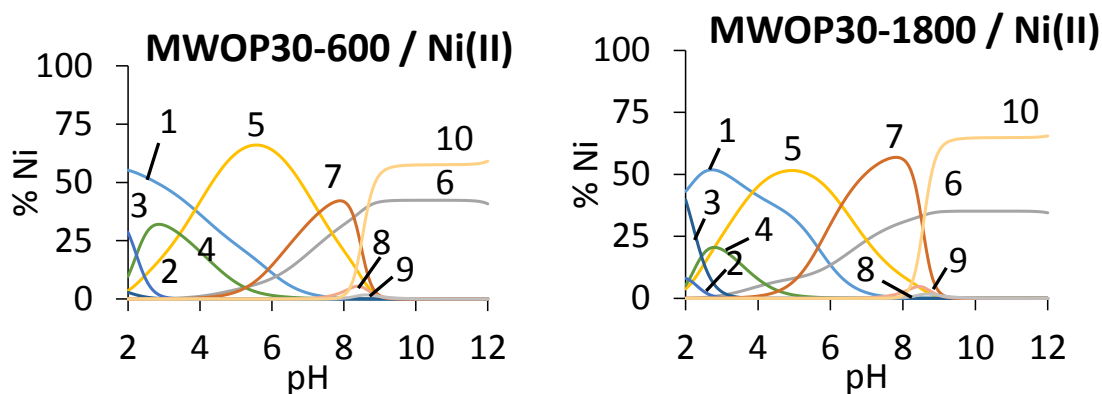

Figure S13. Species distribution plots resulting from the reaction of the hybrids with  $\text{Ni}^{2+}$ . The numbers refer to the equilibria in Table 3.

Table S4. Equilibrium constants (log K) of hybrids/ $\text{Ni}(\text{II})$

| Equilibrium                                                                                  | log K            |                  |
|----------------------------------------------------------------------------------------------|------------------|------------------|
|                                                                                              | MWOP30-600       | MWOP30-1800      |
| $[\text{H}_2\text{L}]^{2+} + \text{Ni}^{2+} \leftrightarrow [\text{NiH}_2\text{L}]^{4+}$     | $1.84 \pm 0.04$  | $4.50 \pm 0.02$  |
| $[\text{H}_3\text{L}_2]^{3+} + \text{Ni}^{2+} \leftrightarrow [\text{NiH}_3\text{L}_2]^{5+}$ | $5.97 \pm 0.06$  | $7.16 \pm 0.08$  |
| $\text{L} + \text{Ni}^{2+} \leftrightarrow [\text{NiL}]^{2+}$                                | $11.95 \pm 0.03$ | $11.95 \pm 0.04$ |
| $2\text{L} + \text{Ni}^{2+} \leftrightarrow [\text{NiL}_2]^{2+}$                             | $22.28 \pm 0.05$ | $22.90 \pm 0.05$ |
| $[\text{L}_2\text{Ni}]^{2+} + \text{H}^+ \leftrightarrow [\text{NiHL}_2]^{3+}$               | $5.25 \pm 0.04$  | $4.20 \pm 0.04$  |
| $\text{Ni}^{2+} + \text{OH}^- \leftrightarrow [\text{Ni}(\text{OH})]^+$                      | $-5.89 \pm 0.01$ | $-5.65 \pm 0.01$ |
| $[\text{Ni}(\text{OH})]^+ + \text{OH}^- \leftrightarrow [\text{Ni}(\text{OH})_2]$            | $-9.11 \pm 0.06$ | $-9.35 \pm 0.07$ |
| $[\text{Ni}(\text{OH})_2] + \text{OH}^- \leftrightarrow [\text{Ni}(\text{OH})_3]^-$          | $-9.00 \pm 0.05$ | $-9.00 \pm 0.04$ |
| $[\text{Ni}(\text{OH})_3]^- + \text{OH}^- \leftrightarrow [\text{Ni}(\text{OH})_4]^{2-}$     | $-7.31 \pm 0.01$ | $-7.30 \pm 0.01$ |

The effective complexation constants have been determined by using the equation:

$$K_{eff} = \frac{\sum[\text{MH}_i\text{L}_j]}{\sum[\text{H}_i\text{L}_j] \sum[\text{M}]}$$

Where [M],  $[\text{H}_i\text{L}_j]$  and  $[\text{MH}_i\text{L}_j]$  are the metal, ligand species and abduct formed by M and  $\text{H}_i\text{L}_j$  at the equilibrium, respectively.

Table S5. A summary of the reported amount of Ni(II) captured by carbon based adsorbents.

| Adsorbent                                                         | Ni(II) (mg/g) | Ref. |
|-------------------------------------------------------------------|---------------|------|
| Activated carbón                                                  | 17.8          | 1    |
| Oxygen-Functionalized Carbons                                     | 72            | 2    |
| Carbon-based adsorber resin Lewatit AF 5                          | 5             | 3    |
| sunflower plant biomass-based carbons                             | 25.2          | 4    |
| Activated Carbon                                                  | 9.4           | 5    |
| expanded graphite modified with phosphoric acid and glucose       | 10            | 6    |
| activated carbon                                                  | 10            | 7    |
| Citrus limettioides Seed and <b>Its Carbon Derivative</b>         | 36            | 8    |
| activated carbons                                                 | 97.3          | 9    |
| activated carbon                                                  | 158.8         | 10   |
| activated carbon with tetraethylenepentamine                      | 128           | 11   |
| on 1-(2-pyridylazo)-2-naphthol impregnated activated carbon cloth | 43.2          | 12   |
| activated carbon                                                  | 48.5          | 13   |
| activated carbon                                                  | 166.7         | 14   |
| activated carbons                                                 | 40.1          | 15   |
| amino functionalized magnetic graphenes                           | 22.1          | 16   |
| activated carbons                                                 | 51            | 17   |
| Activated carbon                                                  | 17.9          | 18   |
| coconut charcoal                                                  | 1.8           | 19   |
| Activated carbon                                                  | 15            | 20   |
| Activated carbon                                                  | 22.2          | 21   |
| Carbon black                                                      | 86.9          | 22   |
| Activated carbon                                                  | 53.2          | 23   |
| activated carbon                                                  | 6.6           | 24   |
| Commercial Carbons Modified with Egg Shell Wastes                 | 9.8           | 25   |
| Active carbon                                                     | 31.5          | 26   |
| of Coconut Oilcake Carbon                                         | 556           | 27   |
| activated carbon derived from walnut shell                        | 15.3          | 28   |
| an active carbon/functionalized polyamine hybrid material         | 2.9           | 29   |
| Pyrolytic Chars                                                   | 25            | 30   |
| Activated carbon                                                  | 31.1          | 31   |
| Activated carbon                                                  | 17.4          | 32   |
| activated carbon/L-lysine derivative                              | 2.9           | 33   |
| carbon nanotubes                                                  | 47.8          | 34   |
| chemically activated carbons                                      | 23            | 35   |
| activated carbon                                                  | 4.9           | 36   |
| Activated carbon                                                  | 54.5          | 37   |
| activated carbon                                                  | 62.5          | 38   |

References.

1. Rajesh, Yennam et al. DESALINATION AND WATER TREATMENT 57, 29 , 13807-13817, 2016.

2. Kern, Andreas M et al. CHEMICAL ENGINEERING & TECHNOLOGY , 39, 4 , 715-722 2016.
3. Wolowicz, Anna et al. MICROPOROUS AND MESOPOROUS MATERIALS 224 , 400-414 2016.
4. Jain, M. et al. INTERNATIONAL JOURNAL OF ENVIRONMENTAL SCIENCE AND TECHNOLOGY 13, 2, 493-500, 2016.
5. Kavand, Mohammad et al. CHEMICAL ENGINEERING COMMUNICATIONS 203, 1, 123-135, 2016.
6. Jiang, Li et al. APPLIED SURFACE SCIENCE 357, 2355-2363, B, 2015.
7. Dwivedi, Amarendra Dhar et al. CHEMICAL ENGINEERING JOURNAL 281, 713-723, 2015.
8. Ramasamy, Sudha et al. ENVIRONMENTAL PROGRESS & SUSTAINABLE ENERGY 34, 5, 1384-1395, 2015.
9. Rao, C. Narasimha et al. DESALINATION AND WATER TREATMENT 54, 12, 3392-3399, 2015.
10. : Kalaivani, S. S. et al. DESALINATION AND WATER TREATMENT 54 , 6 , 1629-1641, 2015.
11. Ghasemi, Maryam et al. POWDER TECHNOLOGY, 274 , 362-371, 2015.
12. Alothman, Zeid A. et al. ECOTOXICOLOGY AND ENVIRONMENTAL SAFETY 112, 74-79, 2015.
13. Liu, Hai et al. RSC ADVANCES 5, 64, 52048-52056, 2015.
14. Mohammadi, Sayed Zia et al. JOURNAL OF INDUSTRIAL AND ENGINEERING CHEMISTRY 20, 6, 4112-4118, 2014.
15. Wang, Jing et al. APPLIED SURFACE SCIENCE 316, 443-450, 2014.
16. Guo, Xiaoyao et al. JOURNAL OF HAZARDOUS MATERIALS 278, 211-220, 2014.
17. Rodriguez-Estupinan, Paola et al. APPLIED SURFACE SCIENCE 286, 351-357, 2013.
18. Gao, Qun et al. POWDER TECHNOLOGY, 249, 234-240, 2013.
19. Wu, Yunhai et al. ENVIRONMENTAL SCIENCE AND POLLUTION RESEARCH 20, 4, 2210-2219, 2013.
20. Gao, Yuan et al. CHEMICAL ENGINEERING JOURNAL 217, 345-353, 2013.
21. Bouhamed, Farah et al. FRESERIUS ENVIRONMENTAL BULLETIN 22, 12 , 3490-3500, 2013.
22. Radenovic, Ankica et al. HEMIJSKA INDUSTRIJA 67, 1, 51-58, 2013.
23. Liu, Hai et al. CHEMICAL ENGINEERING JOURNAL 209, 155-162, 2012.
24. Nabarlaz, Debora et al. JOURNAL OF ENVIRONMENTAL MANAGEMENT 97, 109-115, 2012.
25. Guijarro-Aldaco, Alejandro et al. INDUSTRIAL & ENGINEERING CHEMISTRY RESEARCH 50, 15, 9354-9362, 2011.
26. Huang, LiHui et al. DESALINATION 268, 1-3, 12-19, 2011.
27. Hema, M. et al. ASIAN JOURNAL OF CHEMISTRY 22, 4, 2965-2981, 2010.
28. Wang, Gang et al. DESALINATION AND WATER TREATMENT 16, 1-3, 282-289, 2010.
29. Luz Godino-Salido, M. et al. POLYHEDRON 28, 17, 3781-3787, 2009.
30. Oezbay, N. ENERGY SOURCES PART A-RECOVERY UTILIZATION AND ENVIRONMENTAL EFFECTS 31, 14, 1271-1279, PII 911404106, 2009.
31. Madhavakrishnan, S. et al. E-JOURNAL OF CHEMISTRY 5, 4, 761-769 2008.

32. Lata, Hem et al. JOURNAL OF HAZARDOUS MATERIALS 157, 2-3, 503-509, 2008.
33. Garcia-Martin, Javier et al. EUROPEAN JOURNAL OF INORGANIC CHEMISTRY 7, 1095-1106, 2008.
34. Rao, Gadupudi Purnachadra et al. SEPARATION AND PURIFICATION TECHNOLOGY 58, 1, 224-231 2007.
35. Basso, MC et al. SEPARATION SCIENCE AND TECHNOLOGY 41, 1, 149-165. 2006.
36. Hasar, H. JOURNAL OF HAZARDOUS MATERIALS 97, 1-3, 49-57, PII S0304-3894(02)00237-6, 2003.
37. Kadirvelu, K et al. BIORESOURCE TECHNOLOGY 81, 1, 87-90, 2002.
38. Kadirvelu, K et a. SEPARATION AND PURIFICATION TECHNOLOGY 24, 3, 497-505, 2001.

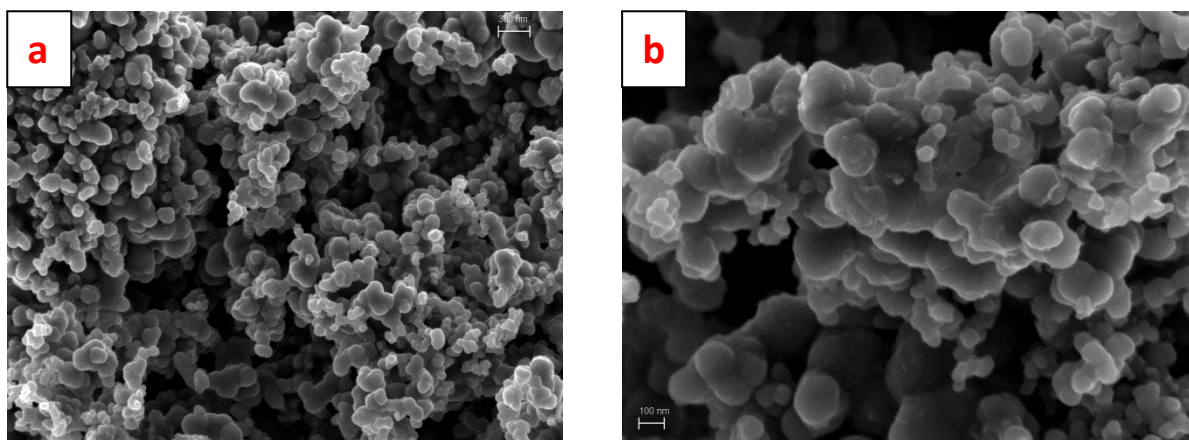

Figure S14. HRTEM images of: a) CSX/OP(10) and b) CSX/OP(10)-1800.
